# Supplementary material for: Prognostic model development and molecular subtypes identification in bladder urothelial cancer by oxidative stress signatures
Source: Aging (Albany NY). 2024 Feb 1;16(3):2591–616. doi: 10.18632/aging.205499 (PMC10911378; doi:10.18632/aging.205499)
Supplement: Supplementary Table 1 [file aging-16-205499-s001.xlsx]

## Sheet: Sheet1
Supplementary Table 1. The OS-related genes from GeneCards database.
MIR675
HDAC6
IL18BP
PPIF
SGK2
TRAP1
DHRS2
ANGPTL7
NET1
SIGMAR1
LANCL1
TLR6
KLF2
RACK1
STK25
FBLN5
PRDX4
ARL6IP5
TXNRD2
TXNIP
RGS14
CAMKK2
PPARGC1A
PRDX3
LIAS
RBPMS
AGAP3
TLDC2
SRXN1
ROMO1
SIRPA
CRYAB
PARP1
CRYGD
SESN3
CTNNB1
CYP1B1
VKORC1L1
CYP2E1
DAPK1
DHCR24
DHFR
NQO1
RCAN1
TOR1A
ECT2
EDN1
EDNRA
EGFR
EIF2S1
AIF1
ENDOG
EPAS1
STX2
CLN8
ERCC1
AKT1
ERCC3
ERN1
ALAD
ETFDH
ETV5
EZH2
ABCD1
FABP1
FANCC
FANCD2
PTK2B
STOX1
ALDH3B1
FER
FKBP1B
ADNP2
MSRB2
PLA2R1
SIRT2
SETX
FOXO1
FOXO3
KDM6B
ATP13A2
SIRT1
FOS
FUT8
FYN
GGT7
NOX1
GJB2
STAU2
SESN1
GCLC
GCLM
HTRA2
H19
GPR37
GPX1
GPX2
GPX3
GPX4
GPX5
GPX7
GSR
GSS
GSTP1
PYCR2
SLC25A24
UBQLN1
ERO1A
ANXA1
HBA1
HBA2
HBB
HDAC2
HGF
HIF1A
HMOX1
HMOX2
NUDT2
HP
APEX1
HSF1
HSPA1A
HSPA1B
HSPB1
APOA4
HYAL1
IDH1
APOD
APOE
APP
IL1A
IL6
AQP1
IL10
INS
JAK2
JUN
MAP3K5
MET
MGMT
MGST1
MICB
MMP2
MMP3
MMP9
MMP14
MPO
MPV17
ABCC1
MSRA
MT3
MT-CO1
MTF1
NUDT1
MT-ND3
MT-ND5
MT-ND6
HNRNPM
ATF4
NDUFA6
NDUFB4
NDUFS2
NDUFS8
ATOX1
NFE2L1
NONO
NOS3
ATP2A2
NR4A2
GPX8
PJVK
OGG1
P4HB
RRM2B
DUOX2
PRDX1
PNPLA8
PRKN
PAWR
PAX2
MYEF2
GLRX2
PCNA
CHCHD2
ZNF580
NME8
WNT16
RWDD1
SCARA3
PDE8A
OSER1
GSKIP
PDGFRA
PDGFRB
PDK1
PDK2
STK26
PENK
PKD2
BAK1
PTPRK
PTPRN
PXN
PYCR1
SELENOK
RAD52
REST
RPS3
S100A7
SDC1
SELENOP
SFPQ
PINK1
SLC1A1
NCF1
SLC8A1
BMP7
SNCA
BNIP3
SOD1
SOD2
SOD3
SP1
SRC
CYB5B
CAPN2
EPX
ACOX2
FZD1
CASP3
C19orf12
SESN2
NME5
SLC4A11
CHD6
STK24
COA8
ATRN
MAP1LC3A
CAT
AIFM2
PPP1R15B
PRKRA
STC2
AKR1C3
ABCB11
BECN1
HYAL2
PNPT1
RIPK1
ADAM9
VNN1
SPHK1
TRPA1
NOL3
ZNF622
PDLIM1
AIFM1
GPR37L1
NAPRT
LONP1
TP53INP1
CD36
PAGE4
CD38
BAG5
MACROH2A1
PRDX6
KEAP1
CDK1
MELK
OXSR1
SLC23A2
CCS
RBX1
